# Supplementary material for: Estimates of incidence and mortality of cervical cancer in 2018: a worldwide analysis
Source: PubMed Central journal article supplement (PMC7025157; doi:10.1016/s2214-109x(19)30482-6), 2019-12-04
Supplement: mmc1.pdf [file mmc1.pdf]

# THE LANCET

## Global Health

### Supplementary appendix

This appendix formed part of the original submission and has been peer reviewed.  
We post it as supplied by the authors.

Supplement to: Arbyn M, Weiderpass E, Bruni L, et al. Estimates of incidence and mortality of cervical cancer in 2018: a worldwide analysis. *Lancet Glob Health* 2019; published online Dec 4. [http://dx.doi.org/10.1016/S2214-109X\(19\)30482-6](http://dx.doi.org/10.1016/S2214-109X(19)30482-6).

## Supplementary appendix

### Worldwide burden of cervical cancer in 2018

Marc Arbyn<sup>1\*</sup>, Elisabete Weiderpass<sup>2</sup>, Laia Bruni<sup>3,4</sup>, Silvia de Sanjosé<sup>4,5</sup>, Mona Saraiya<sup>6</sup>, Jacques Ferlay<sup>2</sup>, Freddie Bray<sup>2</sup>

1 Unit of Cancer Epidemiology, Belgian Cancer Centre, Sciensano, Brussels, Belgium;

2 International Agency for Research on Cancer, Lyon, France;

3 Consortium for Biomedical Research in Epidemiology and Public Health (CIBERESP), Spain;

4 Unit of Infections and Cancer, Catalanian Institute of Oncology, Barcelona, Spain;

5 PATH, Seattle, USA;

6 Centers for Disease Control and Prevention, Division of Cancer Prevention and Control, Atlanta, USA.

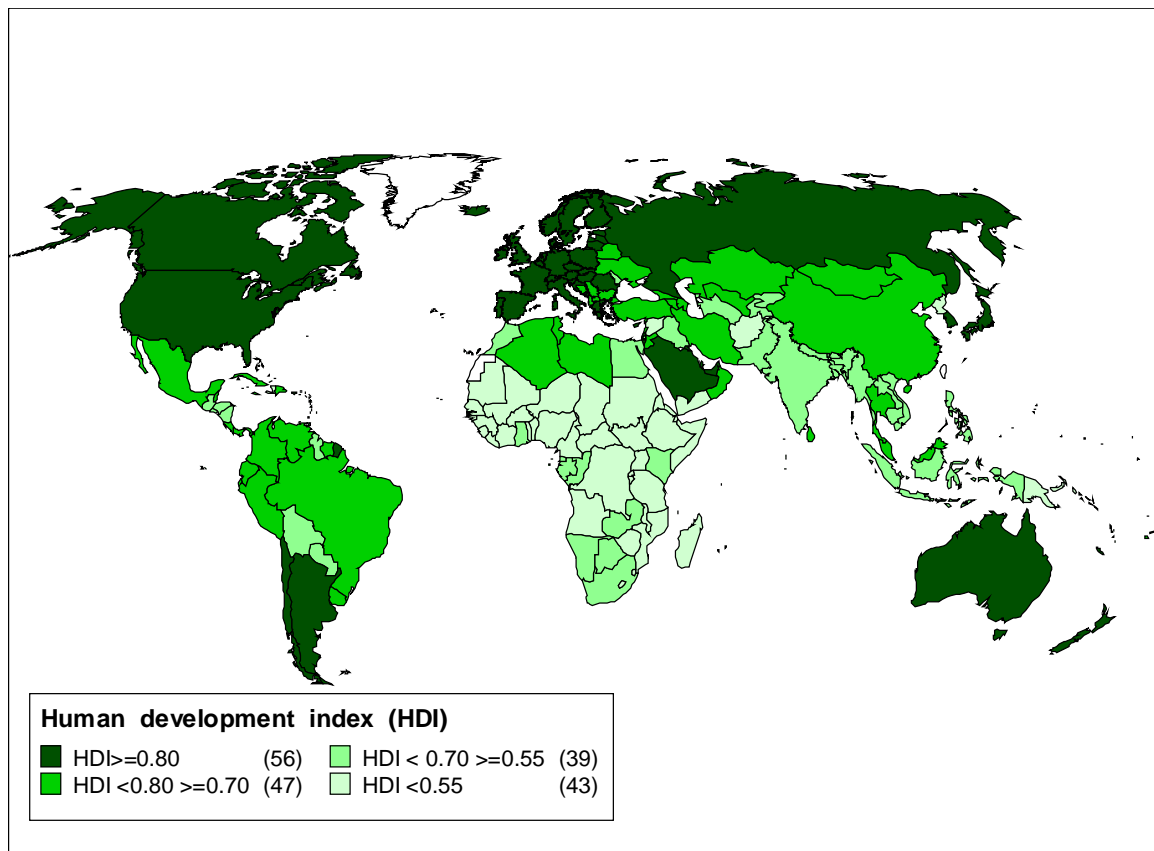

**Supplementary Figure 1.** Human development index (HDI) attributed to the 185 countries included in the study of the burden of cervical cancer. Sources: United Nations Development Programme, New York, 2016 and International Agency for Research on Cancer, Lyon, 2018 (Bray F, et al, CA Cancer J Clin 2018).

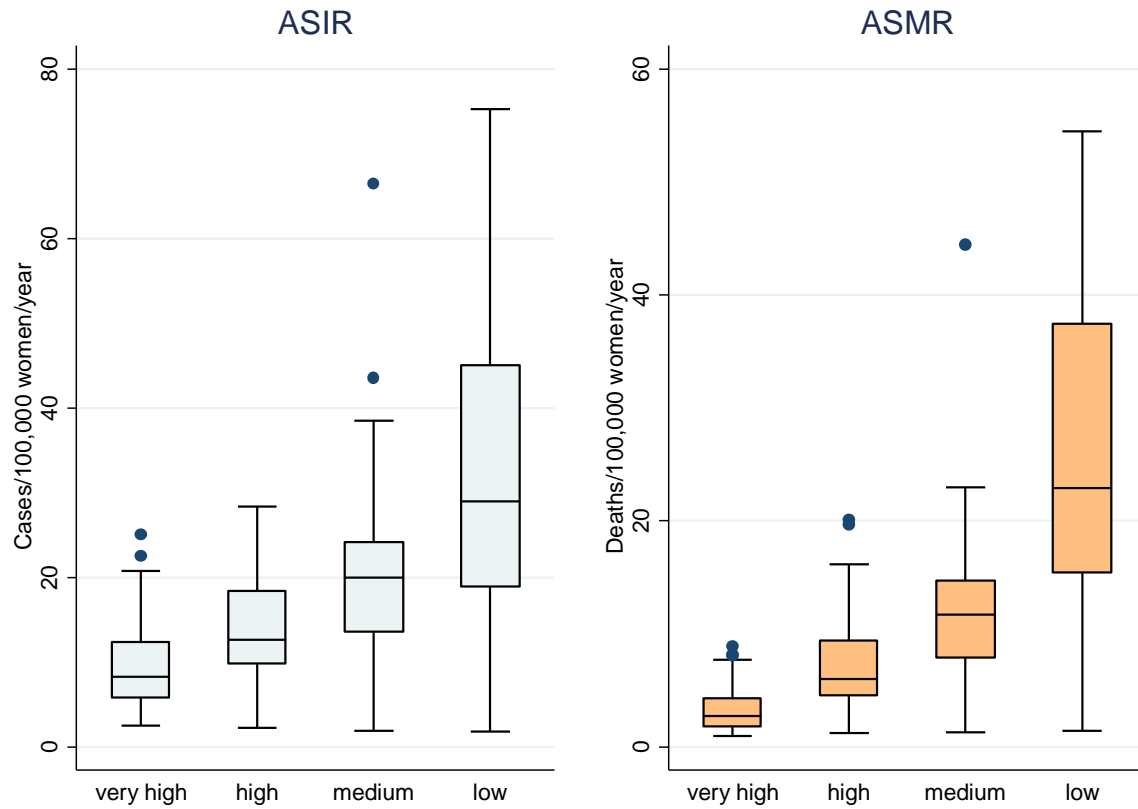

**Supplementary Figure 2.** Distribution of the world age-standardised incidence (ASIR, left) and mortality rate (ASMR, right) by category of socio-economic development (expressed by the human development index).

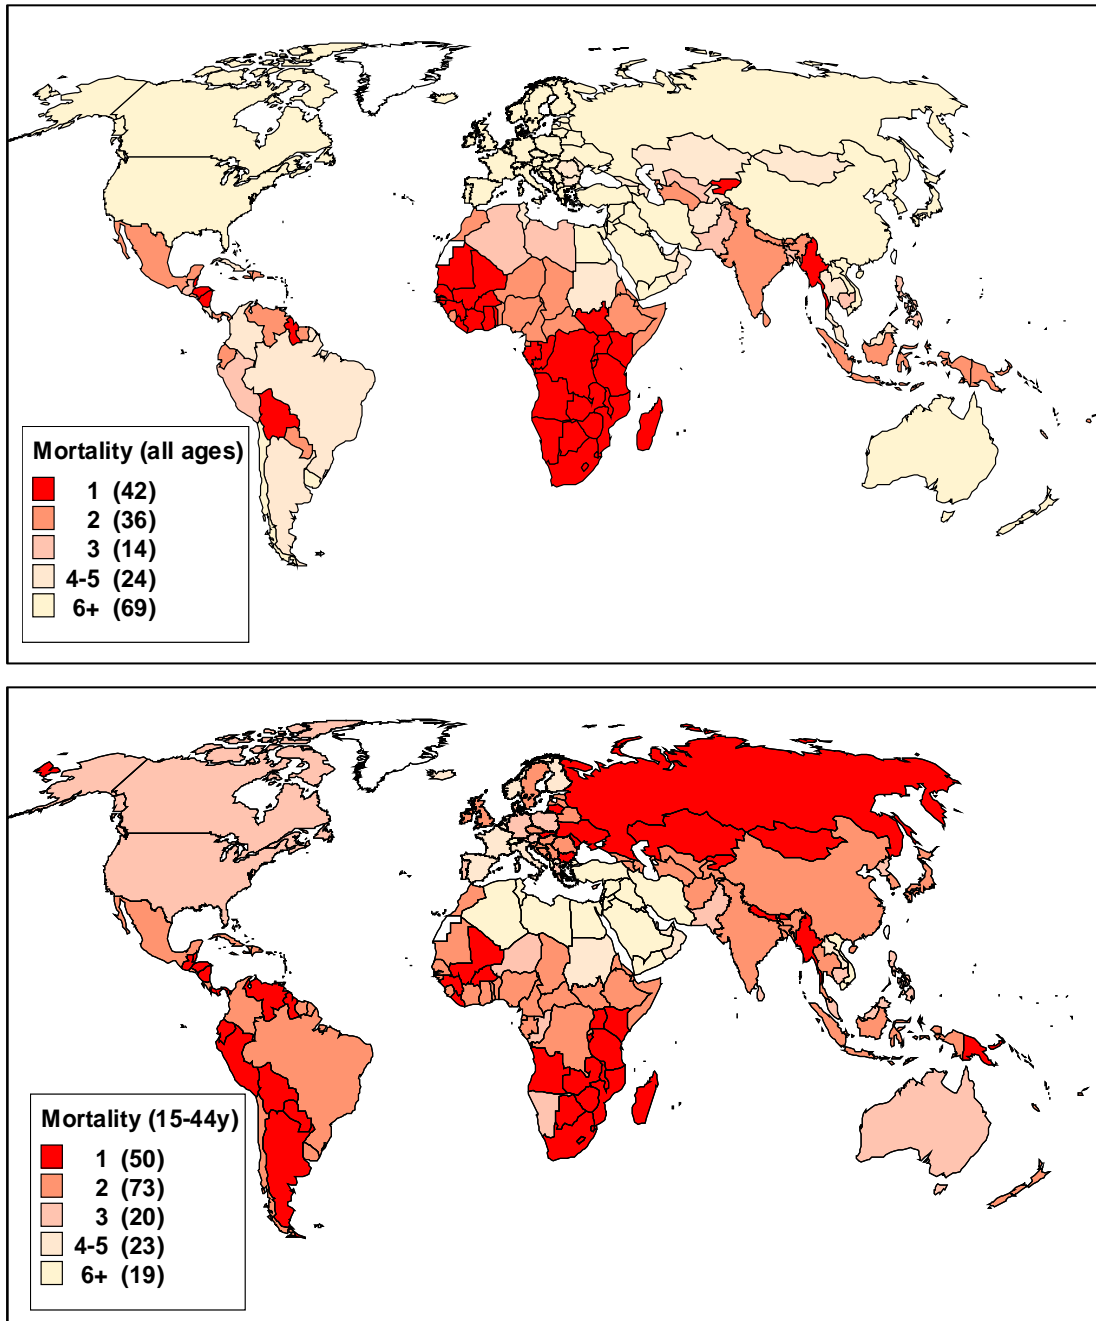

**Supplementary Figure 3.** Ranking of the cervical cancer mortality burden in 2018 relative to all other cancer deaths in women of all ages (top) and aged 15-44 years (bottom).

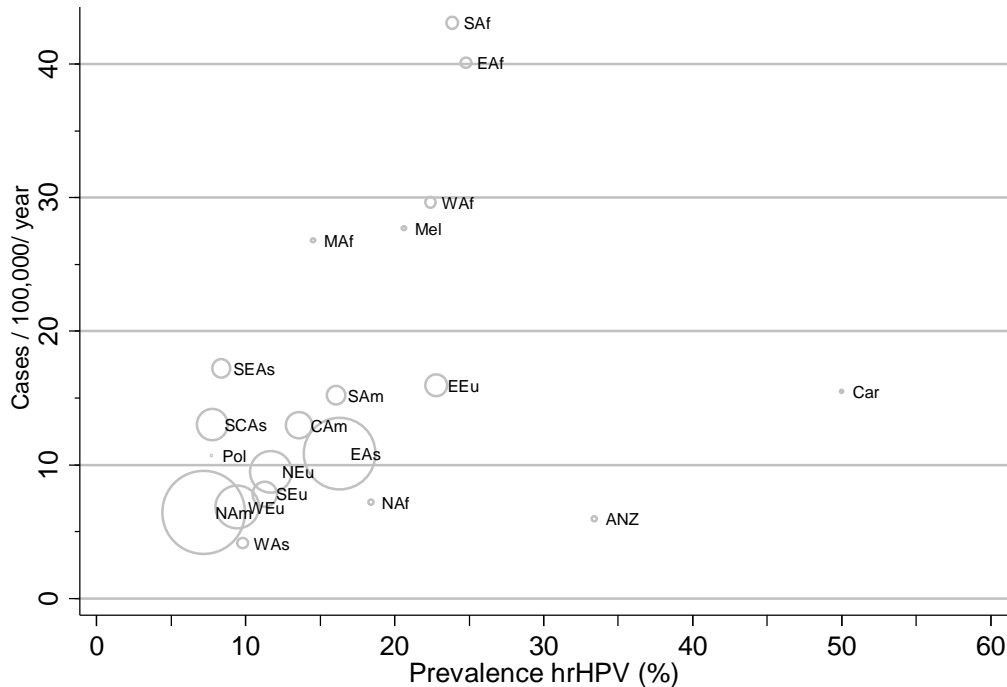

**Supplementary Figure 4.** Age-standardised incidence (computed using the world reference population) of cervical cancer as a function of the prevalence of high-risk HPV infection in women with a normal Pap smear, by sub-continent.

The scatter points are scaled according to the number of tested women per subcontinent, included in the meta-analysis (Bruni, Lancet Global Health et al, 2016; 4: e453-e463; update presented at the 32<sup>nd</sup> International Papillomavirus Conference, Sydney, 2-6 October, 2018).

Note the excessively high pooled hrHPV prevalence in the Carribean and Australia/New-Zealand because of inclusion of specific populations. However, because of the small study sizes from these two subcontinents, the weighted regression was hardly influenced.

EAF=Eastern Africa; NAF=Northern Africa; SAf=Southern Africa; CAM=Central America; Car=Carribbean; NAm=Northern America; SAm=Southern America; EAs=Eastern Asia; SCAs: South-Central Asia; SEAs=South-Eastern Asia; WAs=Western Asia; EEu= Eastern Europe; NEu= Northern Europe; SEu: Southern Europe; WEu= Western Europe).

Prevalence of hrHPV estimates derived from Bruni et al (IPV 2018, Sydney)<sup>32</sup>.

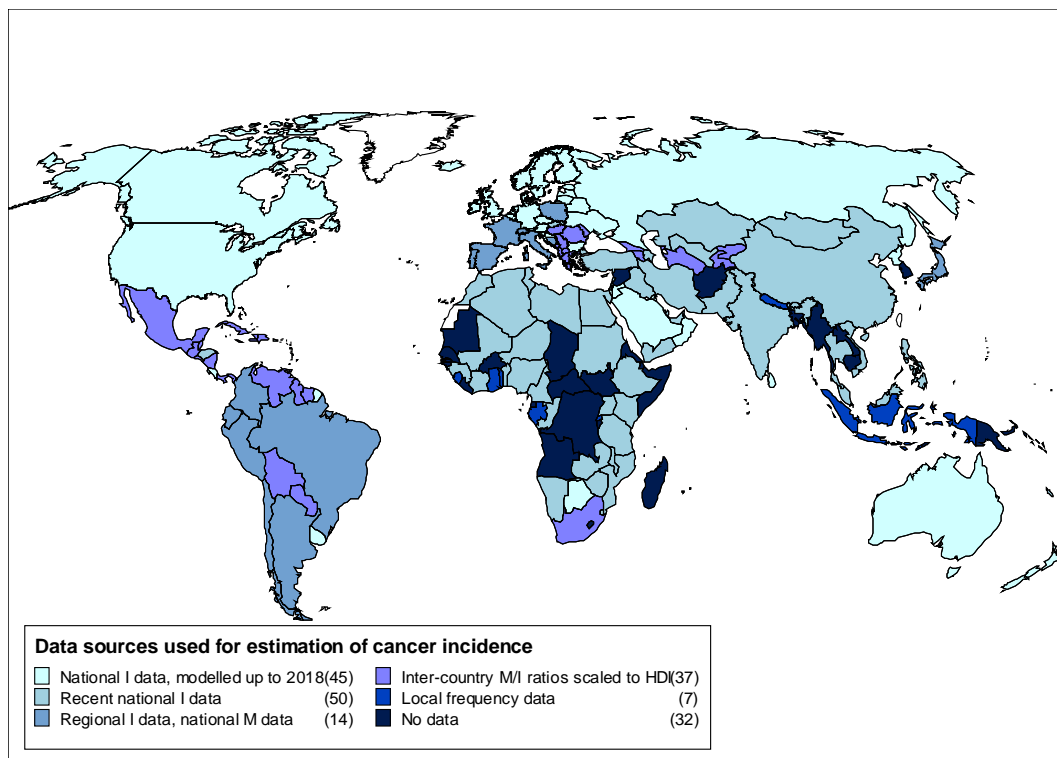

**Supplementary Figure 5.** Availability of data per country to estimate cervical cancer incidence.

HDI: human development index; I: incidence; M: mortality.

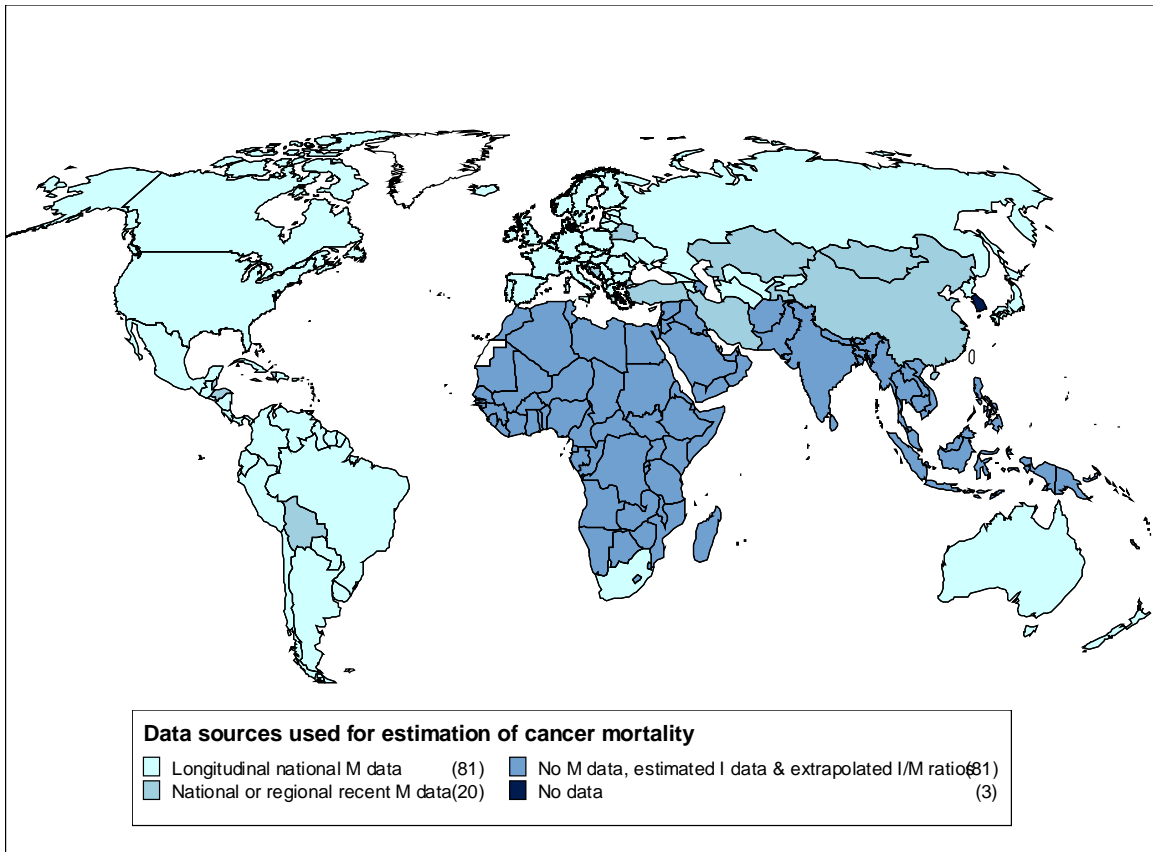

**Supplementary Figure 6.** Availability of data per country to estimate cervical cancer mortality.  
 I: incidence; M: mortality.

**Supplementary Table 1.** Burden of cervical cancer incidence and mortality in 2018, by country, ordered by subcontinent: female population size, number of cases of and deaths from cervical cancer, world-age-standardised incidence (ASIR) and mortality (ASMR) rates; standardised incidence and mortality ratios (SIR; SMR); cumulative rate of developing cervical cancer (CIR) or dying from cervical cancer (CMR) before the age 75 years; percentage and rank that cervical cancer takes among all cancers cases or cancer deaths<sup>†</sup>.

| Country               | Total female population* | Nb of cases | ASIR | SIR | CIR (%) | % of all cancers | Rank (all ages) | Rank (15-44y) | Nb of deaths | ASMR | SMR | CIR (%) | % of all cancers | Rank (all ages) | Rank (15-44y) |
|-----------------------|--------------------------|-------------|------|-----|---------|------------------|-----------------|---------------|--------------|------|-----|---------|------------------|-----------------|---------------|
| <b>Eastern Africa</b> |                          |             |      |     |         |                  |                 |               |              |      |     |         |                  |                 |               |
| Burundi               | 5.7                      | 1,859       | 57.4 | 416 | 6.4     | 38               | 1               | 1             | 1,528        | 50.3 | 724 | 5.8     | 40.5             | 1               | 1             |
| Comoros               | 0.4                      | 141         | 50.9 | 370 | 5.6     | 46               | 1               | 1             | 103          | 39.8 | 567 | 4.6     | 46.6             | 1               | 1             |
| Djibouti              | 0.5                      | 52          | 13.3 | 95  | 1.5     | 12               | 2               | 2             | 39           | 10.6 | 147 | 1.3     | 13.7             | 2               | 2             |
| Eritrea               | 2.6                      | 218         | 13.8 | 97  | 1.6     | 11               | 2               | 2             | 178          | 11.9 | 165 | 1.4     | 12.3             | 2               | 2             |
| Ethiopia              | 53.8                     | 6,294       | 18.9 | 135 | 2.1     | 14               | 2               | 2             | 4,884        | 15.3 | 216 | 1.8     | 15.8             | 2               | 2             |
| France, La Reunion    | 0.5                      | 70          | 10.5 | 88  | 1.1     | 6                | 4               | 2             | 33           | 4    | 73  | 0.4     | 6.2              | 6               | 4             |
| Kenya                 | 25.6                     | 5,250       | 33.8 | 233 | 3.8     | 19               | 2               | 1             | 3,286        | 22.8 | 314 | 2.7     | 17.7             | 1               | 1             |
| Madagascar            | 13.2                     | 4,353       | 51.6 | 374 | 5.7     | 41               | 1               | 1             | 2,940        | 37.4 | 528 | 4.3     | 40.9             | 1               | 1             |
| Malawi                | 9.7                      | 4,163       | 72.9 | 553 | 7.9     | 35               | 1               | 1             | 2,879        | 54.5 | 804 | 6.2     | 36.1             | 1               | 1             |
| Mauritius             | 0.6                      | 120         | 12.4 | 104 | 1.4     | 8                | 3               | 2             | 56           | 5.4  | 85  | 0.7     | 8                | 3               | 2             |
| Mozambique            | 15.6                     | 4,291       | 42.8 | 330 | 4.4     | 31               | 1               | 1             | 3,376        | 35.7 | 534 | 3.8     | 34.2             | 1               | 1             |
| Rwanda                | 6.4                      | 1,304       | 31.9 | 223 | 3.7     | 21               | 1               | 2             | 921          | 24.1 | 333 | 2.9     | 21.5             | 1               | 2             |
| Somalia               | 7.6                      | 989         | 24.0 | 172 | 2.7     | 16               | 2               | 2             | 875          | 21.9 | 320 | 2.5     | 17.3             | 2               | 2             |
| South Sudan           | 6.4                      | 1,101       | 26.9 | 196 | 3.0     | 20               | 2               | 2             | 888          | 22.9 | 327 | 2.7     | 21.8             | 1               | 2             |
| Tanzania              | 29.9                     | 9,772       | 59.1 | 404 | 6.9     | 40               | 1               | 1             | 6,695        | 42.7 | 577 | 5.2     | 41.1             | 1               | 1             |
| Uganda                | 22.2                     | 6,413       | 54.8 | 413 | 5.8     | 36               | 1               | 1             | 4,301        | 40.5 | 601 | 4.5     | 36.6             | 1               | 1             |
| Zambia                | 8.9                      | 2,994       | 66.4 | 442 | 7.7     | 42               | 1               | 1             | 1,839        | 44.5 | 585 | 5.3     | 43.6             | 1               | 1             |
| Zimbabwe              | 8.7                      | 3,186       | 62.3 | 431 | 7.0     | 29               | 1               | 1             | 2,151        | 46   | 628 | 5.4     | 29.5             | 1               | 1             |
| <b>Middle Africa</b>  |                          |             |      |     |         |                  |                 |               |              |      |     |         |                  |                 |               |
| Angola                | 15.7                     | 2,949       | 36.1 | 244 | 4.1     | 33               | 1               | 1             | 1,987        | 26.2 | 350 | 3.1     | 34.1             | 1               | 1             |
| Cameroon              | 12.3                     | 2,356       | 31.3 | 230 | 3.4     | 26               | 2               | 2             | 1,546        | 21.9 | 317 | 2.5     | 25.9             | 2               | 2             |
| Central African Rep.  | 2.4                      | 276         | 19.2 | 139 | 2.2     | 18               | 2               | 2             | 246          | 17.5 | 249 | 2       | 20.3             | 2               | 2             |



| Country                | Total female population* | Nb of cases | ASIR | SIR | CIR (%) | % of all cancers | Rank (all ages) | Rank (15-44y) | Nb of deaths | ASMR | SMR | CIR (%) | % of all cancers | Rank (all ages) | Rank (15-44y) |
|------------------------|--------------------------|-------------|------|-----|---------|------------------|-----------------|---------------|--------------|------|-----|---------|------------------|-----------------|---------------|
| Chad                   | 7.7                      | 742         | 19.3 | 135 | 2.2     | 17               | 2               | 2             | 618          | 16.9 | 239 | 2       | 18.7             | 2               | 2             |
| Congo, DR              | 42.1                     | 5,762       | 24.8 | 172 | 2.9     | 22               | 2               | 2             | 4,665        | 21.1 | 288 | 2.6     | 23.7             | 1               | 2             |
| Congo, Republic of     | 2.7                      | 278         | 17.5 | 113 | 2.1     | 22               | 2               | 2             | 187          | 12.1 | 157 | 1.5     | 24.2             | 1               | 3             |
| Equatorial Guinea      | 0.6                      | 100         | 26.9 | 201 | 2.9     | 24               | 2               | 2             | 57           | 16.7 | 246 | 1.9     | 21.3             | 2               | 2             |
| Gabon                  | 1                        | 156         | 20.0 | 151 | 2.1     | 18               | 2               | 2             | 100          | 13.4 | 197 | 1.5     | 18.7             | 1               | 2             |
| <b>Northern Africa</b> |                          |             |      |     |         |                  |                 |               |              |      |     |         |                  |                 |               |
| Algeria                | 20.8                     | 1,594       | 8.1  | 58  | 0.9     | 6                | 4               | 5             | 1,066        | 5.5  | 76  | 0.7     | 8.1              | 3               | 8             |
| Egypt                  | 49.1                     | 969         | 2.3  | 16  | 0.2     | 2                | 14              | 11            | 631          | 1.5  | 21  | 0.2     | 1.6              | 12              | 12            |
| Libya                  | 3.2                      | 319         | 11.5 | 75  | 1.3     | 10               | 3               | 5             | 127          | 4.9  | 63  | 0.6     | 8.6              | 3               | 10            |
| Morocco                | 18.3                     | 3,388       | 17.2 | 130 | 2.0     | 12               | 2               | 3             | 2,465        | 12.6 | 180 | 1.5     | 17.5             | 2               | 2             |
| Sudan                  | 20.8                     | 1,084       | 8.2  | 57  | 1.0     | 7                | 2               | 3             | 745          | 6    | 80  | 0.8     | 7.7              | 4               | 5             |
| Tunisia                | 5.9                      | 285         | 4.0  | 31  | 0.5     | 4                | 4               | 9             | 199          | 2.8  | 40  | 0.3     | 5                | 5               | 12            |
| <b>Southern Africa</b> |                          |             |      |     |         |                  |                 |               |              |      |     |         |                  |                 |               |
| Botswana               | 1.2                      | 333         | 31.6 | 242 | 3.3     | 32               | 1               | 1             | 166          | 16.9 | 248 | 1.8     | 32.1             | 1               | 1             |
| Eswatini‡              | 0.7                      | 380         | 75.3 | 570 | 7.0     | 55               | 1               | 1             | 238          | 52.5 | 751 | 4.9     | 56.8             | 1               | 1             |
| Lesotho                | 1.2                      | 477         | 52.1 | 410 | 5.0     | 43               | 1               | 1             | 346          | 39.1 | 591 | 3.9     | 45.2             | 1               | 1             |
| Namibia                | 1.3                      | 236         | 24.2 | 177 | 2.6     | 22               | 2               | 2             | 135          | 14.7 | 208 | 1.6     | 23.2             | 1               | 3             |
| South Africa           | 29.2                     | 12,983      | 43.5 | 341 | 4.3     | 23               | 2               | 1             | 5,595        | 19.2 | 286 | 2       | 19.3             | 1               | 1             |
| <b>Western Africa</b>  |                          |             |      |     |         |                  |                 |               |              |      |     |         |                  |                 |               |
| Benin                  | 5.8                      | 783         | 23.7 | 156 | 2.8     | 19               | 2               | 2             | 652          | 20.2 | 266 | 2.4     | 22.5             | 2               | 2             |
| Burkina Faso           | 9.9                      | 2,517       | 45.1 | 316 | 5.1     | 34               | 1               | 1             | 2,081        | 39.4 | 552 | 4.7     | 36.4             | 1               | 1             |
| Cape Verde             | 0.3                      | 50          | 20.5 | 156 | 2.3     | 17               | 1               | 1             | 26           | 11.1 | 160 | 1.4     | 12               | 1               | 1             |
| Cote d'Ivoire          | 12.3                     | 1,789       | 28.6 | 178 | 3.5     | 22               | 2               | 2             | 1,448        | 24.1 | 309 | 3       | 25.4             | 1               | 2             |
| Ghana                  | 14.8                     | 3,151       | 32.9 | 214 | 4.1     | 23               | 2               | 2             | 2,119        | 23   | 301 | 2.9     | 25.5             | 1               | 2             |
| Guinea                 | 6.5                      | 1,810       | 45.5 | 320 | 5.1     | 45               | 1               | 1             | 1,509        | 39.7 | 553 | 4.6     | 47               | 1               | 1             |
| Guinea-Bissau          | 1                        | 191         | 32.7 | 224 | 3.8     | 30               | 1               | 2             | 157          | 28.3 | 387 | 3.4     | 32.9             | 1               | 2             |
| Liberia                | 2.4                      | 548         | 37.2 | 254 | 4.3     | 33               | 1               | 1             | 449          | 32.1 | 435 | 3.9     | 35.2             | 1               | 1             |
| Mali                   | 9.5                      | 2,206       | 43.9 | 307 | 5.1     | 27               | 1               | 2             | 1,704        | 36.2 | 503 | 4.4     | 29.3             | 1               | 1             |

| Country                | Total female population* | Nb of cases | ASIR | SIR | CIR (%) | % of all cancers | Rank (all ages) | Rank (15-44y) | Nb of deaths | ASMR | SMR | CIR (%) | % of all cancers | Rank (all ages) | Rank (15-44y) |
|------------------------|--------------------------|-------------|------|-----|---------|------------------|-----------------|---------------|--------------|------|-----|---------|------------------|-----------------|---------------|
| Mauritania             | 2.3                      | 481         | 32.9 | 226 | 3.7     | 30               | 1               | 2             | 341          | 24.8 | 334 | 2.9     | 31.3             | 1               | 2             |
| Niger                  | 11.1                     | 543         | 9.6  | 69  | 1.1     | 11               | 2               | 3             | 476          | 8.8  | 126 | 1.1     | 12.5             | 2               | 3             |
| Nigeria                | 96.6                     | 14,943      | 27.2 | 183 | 3.3     | 21               | 2               | 2             | 10,403       | 20   | 270 | 2.5     | 25.1             | 2               | 2             |
| Sao Tome & Principe    | 0.1                      | 16          | 20.1 | 179 | 1.4     | 25               | 1               | 1             | 9            | 12.4 | 211 | 0.8     | 23.1             | 1               | 1             |
| Senegal                | 8.3                      | 1,876       | 37.8 | 257 | 4.4     | 28               | 1               | 2             | 1,367        | 29.1 | 392 | 3.6     | 30.2             | 1               | 2             |
| Sierra Leone           | 3.9                      | 299         | 13.8 | 91  | 1.6     | 12               | 2               | 2             | 242          | 12   | 160 | 1.4     | 14.1             | 2               | 2             |
| The Gambia             | 1.1                      | 184         | 29.0 | 217 | 2.9     | 54               | 1               | 1             | 132          | 23.1 | 341 | 2.4     | 51.8             | 1               | 1             |
| Togo                   | 4                        | 568         | 23.8 | 159 | 2.7     | 21               | 2               | 2             | 414          | 18.7 | 247 | 2.2     | 23               | 1               | 2             |
| <b>Carribbean</b>      |                          |             |      |     |         |                  |                 |               |              |      |     |         |                  |                 |               |
| Bahamas                | 0.2                      | 29          | 10.9 | 84  | 1.1     | 7                | 4               | 2             | 23           | 7.9  | 122 | 0.9     | 9.9              | 2               | 5             |
| Barbados               | 0.1                      | 38          | 15.5 | 132 | 1.5     | 7                | 4               | 4             | 27           | 9.4  | 157 | 0.9     | 7.6              | 3               | 5             |
| Cuba                   | 5.7                      | 1,231       | 14.6 | 106 | 1.4     | 6                | 4               | 2             | 597          | 6    | 88  | 0.7     | 5.5              | 4               | 2             |
| Dominican Republic     | 5.5                      | 981         | 17.1 | 136 | 1.7     | 11               | 2               | 2             | 571          | 9.9  | 150 | 1.1     | 11               | 2               | 2             |
| France, Guadeloupe     | 0.2                      | 39          | 9.3  | 80  | 1.0     | 5                | 5               | 3             | 19           | 3.3  | 64  | 0.3     | 5.2              | 6               | 5             |
| France, Martinique     | 0.2                      | 32          | 7.6  | 73  | 0.7     | 4                | 10              | 3             | 14           | 1.9  | 52  | 0.1     | 3.5              | 10              | 28            |
| Haiti                  | 5.6                      | 835         | 17.1 | 133 | 1.8     | 13               | 2               | 1             | 563          | 12.5 | 179 | 1.4     | 12.1             | 2               | 2             |
| Jamaica                | 1.5                      | 486         | 28.4 | 220 | 2.9     | 13               | 3               | 2             | 361          | 20.1 | 296 | 2.3     | 16.3             | 2               | 2             |
| Puerto Rico            | 1.9                      | 262         | 10.2 | 74  | 0.9     | 4                | 7               | 3             | 114          | 3.5  | 54  | 0.4     | 4.6              | 7               | 2             |
| Saint Lucia            | 0.1                      | 15          | 13.0 | 98  | 1.3     | 9                | 3               | 2             | 12           | 10   | 143 | 1.3     | 13.5             | 2               | 2             |
| Trinidad and Tobago    | 0.7                      | 140         | 15.2 | 115 | 1.5     | 8                | 4               | 2             | 97           | 9.4  | 144 | 1       | 10.1             | 2               | 2             |
| <b>Central America</b> |                          |             |      |     |         |                  |                 |               |              |      |     |         |                  |                 |               |
| Belize                 | 0.2                      | 46          | 28.0 | 211 | 2.5     | 26               | 2               | 2             | 25           | 16.2 | 239 | 1.4     | 26.3             | 1               | 1             |
| Costa Rica             | 2.5                      | 351         | 11.2 | 88  | 1.1     | 6                | 5               | 3             | 192          | 5.6  | 88  | 0.6     | 7.4              | 4               | 2             |
| El Salvador            | 3.4                      | 724         | 18.5 | 153 | 1.8     | 12               | 2               | 2             | 386          | 9.4  | 151 | 0.9     | 10.8             | 2               | 2             |
| Guatemala              | 8.8                      | 1,503       | 21.1 | 163 | 2.2     | 17               | 2               | 1             | 793          | 11.7 | 172 | 1.3     | 16.1             | 3               | 1             |
| Honduras               | 4.7                      | 804         | 19.6 | 151 | 2.0     | 15               | 2               | 2             | 480          | 12.5 | 182 | 1.4     | 15.8             | 1               | 1             |
| Mexico                 | 65.7                     | 7,869       | 11.0 | 86  | 1.1     | 8                | 3               | 3             | 4,121        | 5.8  | 86  | 0.6     | 9.7              | 2               | 2             |
| Nicaragua              | 3.2                      | 677         | 21.2 | 165 | 2.2     | 16               | 2               | 2             | 409          | 13.3 | 196 | 1.5     | 16.9             | 1               | 1             |
| Panama                 | 2.1                      | 432         | 18.4 | 145 | 1.8     | 11               | 2               | 2             | 213          | 8.8  | 134 | 0.9     | 11.9             | 2               | 1             |

| Country                   | Total female population* | Nb of cases | ASIR | SIR | CIR (%) | % of all cancers | Rank (all ages) | Rank (15-44y) | Nb of deaths | ASMR | SMR | CIR (%) | % of all cancers | Rank (all ages) | Rank (15-44y) |
|---------------------------|--------------------------|-------------|------|-----|---------|------------------|-----------------|---------------|--------------|------|-----|---------|------------------|-----------------|---------------|
| <b>South America</b>      |                          |             |      |     |         |                  |                 |               |              |      |     |         |                  |                 |               |
| Argentina                 | 22.8                     | 4,484       | 16.7 | 126 | 1.7     | 7                | 4               | 2             | 2,231        | 7.7  | 109 | 0.8     | 6.7              | 5               | 1             |
| Bolivia                   | 5.6                      | 1,949       | 38.5 | 291 | 4.0     | 23               | 1               | 1             | 1,022        | 19   | 291 | 2       | 19.6             | 1               | 1             |
| Brazil                    | 107.3                    | 16,298      | 12.2 | 94  | 1.3     | 6                | 4               | 3             | 8,079        | 5.8  | 86  | 0.6     | 7.1              | 4               | 2             |
| Chile                     | 9.2                      | 1,549       | 12.2 | 98  | 1.2     | 6                | 6               | 2             | 725          | 5    | 80  | 0.5     | 5.4              | 7               | 2             |
| Colombia                  | 25.1                     | 3,853       | 12.7 | 98  | 1.3     | 7                | 4               | 3             | 1,775        | 5.7  | 85  | 0.6     | 7.7              | 5               | 2             |
| Ecuador                   | 8.4                      | 1,612       | 17.8 | 142 | 1.9     | 11               | 2               | 3             | 838          | 9    | 139 | 0.9     | 11.4             | 2               | 1             |
| French Guyana             | 0.1                      | 29          | 20.8 | 157 | 2.2     | 11               | 2               | 2             | 5            | 3.7  | 53  | 0.4     | 7.4              | 5               | 2             |
| Guyana                    | 0.4                      | 124         | 32.7 | 245 | 3.7     | 26               | 2               | 2             | 64           | 17.3 | 246 | 2       | 21.5             | 1               | 1             |
| Paraguay                  | 3.4                      | 1,033       | 31.5 | 251 | 3.1     | 18               | 2               | 2             | 519          | 16   | 243 | 1.7     | 19.6             | 2               | 1             |
| Peru                      | 16.3                     | 4,103       | 23.2 | 181 | 2.4     | 12               | 2               | 2             | 1,836        | 10.2 | 153 | 1.1     | 10.9             | 3               | 1             |
| Suriname                  | 0.3                      | 85          | 26.8 | 204 | 2.9     | 17               | 2               | 2             | 47           | 14.3 | 212 | 1.7     | 16.5             | 2               | 2             |
| Uruguay                   | 1.8                      | 288         | 12.4 | 92  | 1.2     | 4                | 6               | 3             | 168          | 6    | 88  | 0.6     | 4.4              | 7               | 2             |
| Venezuela                 | 16.3                     | 4,174       | 23.7 | 184 | 2.4     | 13               | 2               | 2             | 1,926        | 10.9 | 161 | 1.2     | 12.9             | 2               | 1             |
| <b>North America</b>      |                          |             |      |     |         |                  |                 |               |              |      |     |         |                  |                 |               |
| Canada                    | 18.6                     | 1,434       | 5.7  | 39  | 0.5     | 1                | 14              | 4             | 586          | 1.7  | 26  | 0.2     | 1.5              | 16              | 3             |
| USA                       | 165                      | 14,065      | 6.5  | 46  | 0.6     | 2                | 14              | 3             | 5,266        | 1.9  | 29  | 0.2     | 1.8              | 12              | 3             |
| <b>Eastern Asia</b>       |                          |             |      |     |         |                  |                 |               |              |      |     |         |                  |                 |               |
| China                     | 690.2                    | 106,430     | 10.7 | 81  | 1.1     | 6                | 6               | 3             | 47,739       | 4.4  | 66  | 0.5     | 4.5              | 8               | 2             |
| Japan                     | 65.1                     | 13,277      | 14.7 | 92  | 1.4     | 4                | 9               | 2             | 4,088        | 2.7  | 43  | 0.3     | 2.4              | 11              | 2             |
| Korea, DPR of             | 13.1                     | 1,922       | 11.1 | 84  | 1.1     | 7                | 4               | 2             | 676          | 3.6  | 53  | 0.4     | 3.9              | 8               | 2             |
| Korea, Republic of        | 25.6                     | 3,348       | 8.4  | 63  | 0.8     | 3                | 10              | 4             | 1,029        | 2    | 33  | 0.2     | 3.1              | 10              | 3             |
| Mongolia                  | 1.6                      | 370         | 23.5 | 175 | 2.5     | 14               | 2               | 1             | 150          | 10.2 | 145 | 1.1     | 9                | 4               | 1             |
| <b>South-Eastern Asia</b> |                          |             |      |     |         |                  |                 |               |              |      |     |         |                  |                 |               |
| Brunei Darussalam         | 0.2                      | 52          | 20.6 | 165 | 2.1     | 10               | 3               | 2             | 14           | 6.1  | 90  | 0.8     | 7.8              | 4               | 1             |
| Cambodia                  | 8.3                      | 993         | 13.5 | 99  | 1.5     | 12               | 2               | 3             | 708          | 10.1 | 140 | 1.2     | 12.4             | 3               | 3             |
| Indonesia                 | 132.5                    | 32,469      | 23.4 | 175 | 2.6     | 18               | 2               | 2             | 18,279       | 13.9 | 194 | 1.7     | 18.7             | 2               | 2             |

| Country                   | Total female population* | Nb of cases | ASIR | SIR | CIR (%) | % of all cancers | Rank (all ages) | Rank (15-44y) | Nb of deaths | ASMR | SMR | CIR (%) | % of all cancers | Rank (all ages) | Rank (15-44y) |
|---------------------------|--------------------------|-------------|------|-----|---------|------------------|-----------------|---------------|--------------|------|-----|---------|------------------|-----------------|---------------|
| Lao PDR                   | 3.5                      | 320         | 11.4 | 83  | 1.3     | 8                | 4               | 3             | 182          | 7    | 97  | 0.8     | 7.4              | 6               | 4             |
| Malaysia                  | 15.5                     | 1,682       | 10.5 | 79  | 1.2     | 7                | 3               | 2             | 944          | 6    | 86  | 0.7     | 7.6              | 4               | 3             |
| Myanmar                   | 27.6                     | 6,472       | 21.5 | 166 | 2.2     | 19               | 1               | 1             | 3,856        | 13.1 | 192 | 1.5     | 16.3             | 1               | 1             |
| Philippines               | 52.9                     | 7,190       | 14.9 | 112 | 1.6     | 9                | 2               | 2             | 4,088        | 8.8  | 125 | 1       | 9.9              | 3               | 3             |
| Singapore                 | 2.9                      | 429         | 7.7  | 72  | 0.8     | 4                | 8               | 7             | 208          | 3.8  | 61  | 0.4     | 3.6              | 9               | 2             |
| Thailand                  | 35.5                     | 8,622       | 16.2 | 126 | 1.7     | 10               | 2               | 2             | 5,015        | 9    | 129 | 1       | 10.1             | 4               | 2             |
| Timor-Leste               | 0.7                      | 50          | 12.5 | 93  | 1.4     | 14               | 2               | 2             | 24           | 6.2  | 89  | 0.7     | 10.8             | 3               | 3             |
| Viet Nam                  | 48.7                     | 4,177       | 7.1  | 54  | 0.8     | 6                | 7               | 3             | 2,420        | 4    | 58  | 0.5     | 5.5              | 6               | 7             |
| <b>South Central Asia</b> |                          |             |      |     |         |                  |                 |               |              |      |     |         |                  |                 |               |
| Afghanistan               | 17.6                     | 694         | 6.6  | 50  | 0.7     | 7                | 2               | 2             | 520          | 5.3  | 80  | 0.6     | 7.2              | 4               | 2             |
| Bangladesh                | 82.5                     | 8,068       | 10.6 | 78  | 1.2     | 12               | 2               | 2             | 5,214        | 7.1  | 103 | 0.8     | 11.5             | 3               | 2             |
| Bhutan                    | 0.4                      | 48          | 14.4 | 105 | 1.6     | 18               | 1               | 1             | 32           | 10.2 | 146 | 1.2     | 14.9             | 2               | 1             |
| India                     | 652.5                    | 96,922      | 14.7 | 111 | 1.6     | 17               | 2               | 2             | 60,078       | 9.2  | 133 | 1       | 16.3             | 2               | 2             |
| Iran, Islamic Rep.        | 40.8                     | 917         | 2.2  | 16  | 0.2     | 2                | 16              | 10            | 467          | 1.2  | 16  | 0.1     | 2                | 12              | 10            |
| Kazakhstan                | 9.5                      | 1,729       | 15.7 | 119 | 1.6     | 10               | 2               | 2             | 838          | 7.5  | 106 | 0.8     | 8.4              | 4               | 1             |
| Kyrgyzstan                | 3.1                      | 601         | 19.9 | 153 | 2.1     | 17               | 2               | 1             | 318          | 10.9 | 159 | 1.2     | 15.1             | 1               | 1             |
| Maldives                  | 0.2                      | 41          | 23.2 | 167 | 2.6     | 19               | 2               | 2             | 21           | 13.4 | 178 | 1.7     | 24.7             | 2               | 2             |
| Nepal                     | 15.2                     | 2,942       | 21.5 | 161 | 2.3     | 19               | 1               | 1             | 1,928        | 14.3 | 209 | 1.6     | 17.3             | 2               | 1             |
| Pakistan                  | 97.7                     | 5,601       | 7.3  | 54  | 0.8     | 6                | 3               | 2             | 3,861        | 5.2  | 75  | 0.6     | 6.8              | 3               | 3             |
| Sri Lanka                 | 10.9                     | 1,136       | 7.8  | 63  | 0.9     | 9                | 2               | 4             | 643          | 4.2  | 64  | 0.5     | 9.4              | 2               | 3             |
| Tajikistan                | 4.5                      | 220         | 5.7  | 45  | 0.6     | 8                | 5               | 2             | 116          | 3.2  | 49  | 0.3     | 6.2              | 4               | 2             |
| Turkmenistan              | 3                        | 397         | 13.6 | 105 | 1.4     | 13               | 2               | 2             | 247          | 8.8  | 130 | 1       | 12               | 2               | 2             |
| Uzbekistan                | 16.2                     | 1,608       | 9.9  | 75  | 1.1     | 11               | 2               | 2             | 850          | 5.4  | 79  | 0.6     | 9.9              | 3               | 2             |
| <b>Western Asia</b>       |                          |             |      |     |         |                  |                 |               |              |      |     |         |                  |                 |               |
| Armenia                   | 1.6                      | 196         | 8.4  | 69  | 1.0     | 5                | 8               | 2             | 136          | 5.6  | 83  | 0.7     | 4.8              | 7               | 2             |
| Azerbaijan                | 5                        | 397         | 6.5  | 50  | 0.7     | 7                | 4               | 2             | 272          | 4.6  | 65  | 0.6     | 7.5              | 4               | 2             |
| Bahrain                   | 0.6                      | 19          | 3.8  | 25  | 0.5     | 3                | 8               | 6             | 12           | 2.7  | 34  | 0.4     | 4.1              | 6               | 8             |
| Georgia                   | 2                        | 297         | 9.8  | 75  | 1.0     | 7                | 4               | 2             | 186          | 5.5  | 78  | 0.6     | 7.2              | 4               | 2             |
| Iraq                      | 19.4                     | 244         | 1.9  | 13  | 0.2     | 2                | 13              | 10            | 159          | 1.3  | 18  | 0.1     | 2.2              | 12              | 9             |

| Country                | Total female population* | Nb of cases | ASIR | SIR | CIR (%) | % of all cancers | Rank (all ages) | Rank (15-44y) | Nb of deaths | ASMR | SMR | CIR (%) | % of all cancers | Rank (all ages) | Rank (15-44y) |
|------------------------|--------------------------|-------------|------|-----|---------|------------------|-----------------|---------------|--------------|------|-----|---------|------------------|-----------------|---------------|
| Israel                 | 4.3                      | 241         | 4.8  | 37  | 0.5     | 2                | 14              | 5             | 132          | 2.1  | 35  | 0.2     | 2.2              | 13              | 5             |
| Jordan                 | 4.9                      | 104         | 2.9  | 20  | 0.3     | 2                | 12              | 10            | 61           | 1.8  | 25  | 0.2     | 2.3              | 14              | 7             |
| Kuwait                 | 1.8                      | 59          | 3.3  | 23  | 0.4     | 3                | 8               | 3             | 31           | 2.2  | 27  | 0.3     | 3.9              | 8               | 4             |
| Lebanon                | 3                        | 192         | 5.7  | 46  | 0.6     | 2                | 10              | 7             | 125          | 3.6  | 56  | 0.4     | 3.2              | 9               | 7             |
| Oman                   | 1.6                      | 77          | 6.3  | 44  | 0.7     | 6                | 4               | 4             | 41           | 3.9  | 51  | 0.5     | 6.9              | 4               | 4             |
| Palestine              | 2.5                      | 38          | 2.5  | 17  | 0.3     | 2                | 16              | 11            | 27           | 1.9  | 26  | 0.2     | 2.2              | 13              | 10            |
| Qatar                  | 0.7                      | 19          | 4.0  | 23  | 0.5     | 4                | 5               | 5             | 12           | 3.2  | 35  | 0.5     | 5.2              | 5               | 4             |
| Saudi Arabia           | 14.3                     | 316         | 2.5  | 18  | 0.3     | 3                | 9               | 9             | 158          | 1.5  | 19  | 0.2     | 3.6              | 9               | 6             |
| Syrian Arab Republic   | 9.1                      | 259         | 3.5  | 27  | 0.4     | 2                | 12              | 9             | 190          | 2.7  | 39  | 0.3     | 2.7              | 9               | 8             |
| Turkey                 | 41.5                     | 2,356       | 4.8  | 37  | 0.5     | 3                | 13              | 5             | 1,280        | 2.5  | 37  | 0.3     | 3.1              | 10              | 8             |
| United Arab Emirates   | 2.7                      | 108         | 6.4  | 31  | 0.7     | 4                | 5               | 4             | 56           | 4.4  | 38  | 0.5     | 5.8              | 5               | 4             |
| Yemen                  | 14.3                     | 170         | 1.9  | 14  | 0.2     | 2                | 13              | 8             | 115          | 1.4  | 20  | 0.2     | 2.4              | 12              | 10            |
| <b>Eastern Europe</b>  |                          |             |      |     |         |                  |                 |               |              |      |     |         |                  |                 |               |
| Belarus                | 5.1                      | 979         | 13.3 | 95  | 1.3     | 5                | 9               | 3             | 318          | 3.8  | 51  | 0.4     | 3.9              | 10              | 2             |
| Bulgaria               | 3.6                      | 1,080       | 20.3 | 138 | 2.0     | 7                | 4               | 2             | 475          | 7.4  | 96  | 0.8     | 6                | 5               | 1             |
| Czech Republic         | 5.4                      | 813         | 9.9  | 72  | 1.0     | 3                | 12              | 3             | 435          | 4    | 63  | 0.4     | 3.6              | 8               | 2             |
| Hungary                | 5.1                      | 1,312       | 17.2 | 122 | 1.7     | 4                | 6               | 2             | 499          | 5.1  | 75  | 0.6     | 3.3              | 8               | 2             |
| Moldova                | 2.1                      | 639         | 21.4 | 158 | 2.2     | 9                | 3               | 1             | 259          | 7.9  | 112 | 0.9     | 7.4              | 4               | 1             |
| Poland                 | 19.7                     | 3,220       | 9.4  | 80  | 1.0     | 4                | 7               | 4             | 1,947        | 4.9  | 79  | 0.6     | 4                | 9               | 3             |
| Romania                | 10.1                     | 3,308       | 19.5 | 158 | 2.2     | 9                | 3               | 2             | 1,743        | 8.9  | 135 | 1       | 8.4              | 4               | 2             |
| Russian Federation     | 77.1                     | 18,164      | 17.0 | 117 | 1.6     | 7                | 4               | 2             | 7,579        | 6.2  | 81  | 0.6     | 5.3              | 8               | 1             |
| Slovakia               | 2.8                      | 692         | 16.6 | 122 | 1.7     | 5                | 6               | 2             | 281          | 5.7  | 83  | 0.6     | 4.1              | 9               | 1             |
| Ukraine                | 23.7                     | 5,733       | 17.0 | 116 | 1.7     | 7                | 4               | 2             | 2,475        | 6.6  | 82  | 0.7     | 5.7              | 9               | 1             |
| <b>Northern Europe</b> |                          |             |      |     |         |                  |                 |               |              |      |     |         |                  |                 |               |
| Denmark                | 2.9                      | 415         | 10.9 | 72  | 1.0     | 2                | 11              | 3             | 131          | 2    | 37  | 0.2     | 1.6              | 15              | 3             |
| Estonia                | 0.7                      | 230         | 22.5 | 159 | 2.2     | 7                | 5               | 2             | 60           | 4.3  | 65  | 0.5     | 3.3              | 10              | 2             |
| Finland                | 2.8                      | 182         | 4.7  | 32  | 0.4     | 1                | 18              | 4             | 64           | 0.9  | 18  | 0.1     | 1.1              | 19              | 5             |
| Iceland                | 0.2                      | 15          | 7.6  | 50  | 0.6     | 2                | 13              | 2             | 3            | 1.3  | 17  | 0.2     | 1                | 17              | 4             |
| Ireland                | 2.4                      | 340         | 11.0 | 77  | 1.0     | 3                | 9               | 4             | 107          | 2.9  | 42  | 0.3     | 2.3              | 14              | 2             |

| Country                      | Total female population* | Nb of cases | ASIR | SIR | CIR (%) | % of all cancers | Rank (all ages) | Rank (15-44y) | Nb of deaths | ASMR | SMR | CIR (%) | % of all cancers | Rank (all ages) | Rank (15-44y) |
|------------------------------|--------------------------|-------------|------|-----|---------|------------------|-----------------|---------------|--------------|------|-----|---------|------------------|-----------------|---------------|
| Latvia                       | 1                        | 339         | 25.0 | 151 | 2.3     | 6                | 5               | 1             | 134          | 6.5  | 93  | 0.7     | 4.7              | 9               | 2             |
| Lithuania                    | 1.6                      | 431         | 18.9 | 131 | 1.9     | 5                | 4               | 2             | 209          | 7.2  | 100 | 0.8     | 5.6              | 7               | 1             |
| Norway                       | 2.6                      | 361         | 10.7 | 72  | 1.0     | 3                | 10              | 3             | 89           | 1.7  | 29  | 0.2     | 1.7              | 16              | 4             |
| Sweden                       | 5                        | 558         | 9.0  | 58  | 0.8     | 2                | 11              | 3             | 222          | 2    | 37  | 0.2     | 2                | 14              | 2             |
| United Kingdom               | 33.7                     | 3,430       | 8.4  | 52  | 0.7     | 2                | 13              | 2             | 1,033        | 1.7  | 26  | 0.2     | 1.2              | 18              | 2             |
| <b>Southern Europe</b>       |                          |             |      |     |         |                  |                 |               |              |      |     |         |                  |                 |               |
| Albania                      | 1.5                      | 134         | 6.5  | 50  | 0.7     | 4                | 8               | 4             | 53           | 2.3  | 34  | 0.3     | 3.4              | 10              | 6             |
| Bosnia Herzegovina           | 1.8                      | 556         | 23.9 | 152 | 2.2     | 9                | 3               | 1             | 141          | 4.7  | 63  | 0.5     | 3.9              | 10              | 2             |
| Croatia                      | 2.2                      | 266         | 7.9  | 59  | 0.8     | 2                | 13              | 3             | 175          | 3.7  | 61  | 0.4     | 2.8              | 12              | 2             |
| Cyprus                       | 0.6                      | 45          | 5.7  | 42  | 0.5     | 2                | 12              | 3             | 18           | 1.5  | 29  | 0.1     | 2                | 14              | 3             |
| FYR Macedonia                | 1                        | 151         | 10.0 | 76  | 1.0     | 4                | 6               | 3             | 59           | 3.5  | 51  | 0.4     | 3.8              | 11              | 5             |
| Greece                       | 5.7                      | 696         | 8.1  | 57  | 0.8     | 3                | 12              | 4             | 271          | 2.1  | 36  | 0.2     | 2.1              | 11              | 3             |
| Italy                        | 30.4                     | 3,105       | 7.1  | 46  | 0.7     | 2                | 16              | 4             | 986          | 1.5  | 23  | 0.2     | 1.3              | 17              | 4             |
| Malta                        | 0.2                      | 11          | 3.5  | 25  | 0.4     | 1                | 17              | 6             | 7            | 1.4  | 26  | 0.1     | 1.8              | 16              | 28            |
| Montenegro                   | 0.3                      | 54          | 12.5 | 89  | 1.2     | 5                | 4               | 2             | 21           | 4.2  | 58  | 0.4     | 3.9              | 7               | 2             |
| Portugal                     | 5.4                      | 750         | 8.9  | 64  | 0.8     | 3                | 9               | 3             | 340          | 2.8  | 46  | 0.3     | 3                | 13              | 3             |
| Serbia                       | 4.5                      | 1,327       | 20.3 | 149 | 2.1     | 6                | 5               | 2             | 551          | 7    | 101 | 0.8     | 4.8              | 6               | 2             |
| Slovenia                     | 1                        | 110         | 7.1  | 50  | 0.7     | 2                | 14              | 3             | 65           | 2.8  | 47  | 0.3     | 2.3              | 13              | 2             |
| Spain                        | 23.6                     | 1,942       | 5.2  | 38  | 0.5     | 2                | 16              | 4             | 825          | 1.7  | 26  | 0.2     | 1.9              | 16              | 5             |
| <b>Western Europe</b>        |                          |             |      |     |         |                  |                 |               |              |      |     |         |                  |                 |               |
| Austria                      | 4.5                      | 390         | 5.5  | 42  | 0.5     | 2                | 14              | 4             | 163          | 1.7  | 28  | 0.2     | 1.6              | 17              | 3             |
| Belgium                      | 5.8                      | 640         | 7.8  | 56  | 0.8     | 2                | 14              | 4             | 235          | 2    | 33  | 0.2     | 1.8              | 17              | 5             |
| France                       | 33.1                     | 3,067       | 6.7  | 47  | 0.6     | 2                | 13              | 4             | 1,472        | 2.3  | 36  | 0.2     | 1.9              | 16              | 4             |
| Germany                      | 41.7                     | 4,608       | 7.5  | 51  | 0.7     | 2                | 15              | 4             | 2,011        | 2.2  | 35  | 0.2     | 1.8              | 17              | 3             |
| Luxembourg                   | 0.3                      | 25          | 5.6  | 45  | 0.5     | 2                | 12              | 4             | 11           | 2    | 33  | 0.2     | 2.2              | 13              | 2             |
| Switzerland                  | 4.3                      | 258         | 3.8  | 29  | 0.4     | 1                | 18              | 6             | 104          | 1.1  | 19  | 0.1     | 1.3              | 19              | 7             |
| The Netherlands              | 8.6                      | 670         | 5.7  | 39  | 0.5     | 1                | 12              | 3             | 250          | 1.4  | 23  | 0.1     | 1.1              | 19              | 4             |
| <b>Australia/New Zealand</b> |                          |             |      |     |         |                  |                 |               |              |      |     |         |                  |                 |               |

| Country                     | Total female population* | Nb of cases | ASIR | SIR | CIR (%) | % of all cancers | Rank (all ages) | Rank (15-44y) | Nb of deaths | ASMR | SMR | CIR (%) | % of all cancers | Rank (all ages) | Rank (15-44y) |
|-----------------------------|--------------------------|-------------|------|-----|---------|------------------|-----------------|---------------|--------------|------|-----|---------|------------------|-----------------|---------------|
| Australia                   | 12.4                     | 924         | 6.0  | 41  | 0.5     | 1                | 14              | 5             | 331          | 1.7  | 24  | 0.2     | 1.6              | 18              | 3             |
| New Zealand                 | 2.4                      | 190         | 6.0  | 43  | 0.6     | 2                | 13              | 4             | 72           | 1.8  | 27  | 0.2     | 1.6              | 18              | 2             |
| <b>Melanesia</b>            |                          |             |      |     |         |                  |                 |               |              |      |     |         |                  |                 |               |
| Fiji                        | 0.4                      | 124         | 25.9 | 198 | 2.6     | 14               | 2               | 2             | 94           | 19.7 | 286 | 2.1     | 18.5             | 2               | 2             |
| New Caledonia               | 0.1                      | 30          | 16.5 | 132 | 1.5     | 5                | 5               | 3             | 16           | 8.2  | 127 | 0.8     | 8.8              | 3               | 2             |
| Papua New Guinea            | 4.1                      | 1,024       | 29.1 | 232 | 2.7     | 16               | 2               | 2             | 663          | 19.8 | 305 | 2       | 17.5             | 2               | 1             |
| Solomon Islands             | 0.3                      | 55          | 22.6 | 183 | 2.3     | 18               | 2               | 2             | 39           | 16   | 272 | 1.6     | 22.7             | 1               | 1             |
| Vanuatu                     | 0.1                      | 21          | 17.0 | 138 | 1.7     | 18               | 2               | 2             | 13           | 10.6 | 173 | 1.1     | 19.7             | 2               | 1             |
| <b>Micronesia/Polynesia</b> |                          |             |      |     |         |                  |                 |               |              |      |     |         |                  |                 |               |
| Guam                        | 0.1                      | 18          | 18.7 | 142 | 2.1     | 10               | 3               | 2             | 9            | 8.1  | 127 | 1       | 8.2              | 3               | 4             |
| French Polynesia            | 0.1                      | 17          | 10.1 | 78  | 1.1     | 5                | 6               | 3             | 7            | 4.3  | 60  | 0.5     | 4                | 6               | 4             |
| Samoa                       | 0.1                      | 10          | 12.6 | 93  | 1.5     | 5                | 5               | 3             | 6            | 7.5  | 103 | 1       | 6                | 5               | 5             |

ASIR: age-standardised incidence rate; ASMR: age-standardised mortality rate; SIR: standardised incidence ratio; SMR: standardised mortality ratio; CIR: cumulative incidence rate; CMR: cumulative mortality rate; DR: Democratic Republic; DPR: Democratic People's Republic; PDR: People's Democratic Republic; Rep: Republic; HDI: human development index: 1=very high; 2=high; 3=medium; 4=low..

\* in millions; † all cancers except non-melanoma cancers; ‡ Eswatini: previously named Swaziland.

**STROBE Statement—checklist of items that should be included in reports of observational studies** (von Elm, *Ann Intern Med* 2007; 147: 573-577)

|                      | Item No | Recommendation                                                                                                                                                                                                                                                                                                                                                                                                                                                                 | Implementation of STROBE items                                                                                                                                                                                                                                                         |
|----------------------|---------|--------------------------------------------------------------------------------------------------------------------------------------------------------------------------------------------------------------------------------------------------------------------------------------------------------------------------------------------------------------------------------------------------------------------------------------------------------------------------------|----------------------------------------------------------------------------------------------------------------------------------------------------------------------------------------------------------------------------------------------------------------------------------------|
| Title and abstract   | 1       | (a) Indicate the study’s design with a commonly used term in the title or the abstract                                                                                                                                                                                                                                                                                                                                                                                         | Title makes clear that design is descriptive analysis of the burden of cervical cancer in 2018                                                                                                                                                                                         |
|                      |         | (b) Provide in the abstract an informative and balanced summary of what was done and what was found                                                                                                                                                                                                                                                                                                                                                                            | A balanced and informative summary is provided in the abstract structured according to Lancet instructions.                                                                                                                                                                            |
| <b>Introduction</b>  |         |                                                                                                                                                                                                                                                                                                                                                                                                                                                                                |                                                                                                                                                                                                                                                                                        |
| Background/rationale | 2       | Explain the scientific background and rationale for the investigation being reported                                                                                                                                                                                                                                                                                                                                                                                           | See first four paragraphs of the Introduction.                                                                                                                                                                                                                                         |
| Objectives           | 3       | State specific objectives, including any prespecified hypotheses                                                                                                                                                                                                                                                                                                                                                                                                               | See last sentence of the Introduction.                                                                                                                                                                                                                                                 |
| <b>Methods</b>       |         |                                                                                                                                                                                                                                                                                                                                                                                                                                                                                |                                                                                                                                                                                                                                                                                        |
| Study design         | 4       | Present key elements of study design early in the paper                                                                                                                                                                                                                                                                                                                                                                                                                        | Observational study using standard components of recent cancer and mortality registries completed with extrapolations towards 2018 and extrapolations for countries with incomplete or lacking data using the best available representative data sources.                              |
| Setting              | 5       | Describe the setting, locations, and relevant dates, including periods of recruitment, exposure, follow-up, and data collection                                                                                                                                                                                                                                                                                                                                                | The geographical area are 185 countries, aggregated at subcontinent and world level. Estimates concern the year 2018.                                                                                                                                                                  |
| Participants         | 6       | (a) <i>Cohort study</i> —Give the eligibility criteria, and the sources and methods of selection of participants. Describe methods of follow-up<br><br><i>Case-control study</i> —Give the eligibility criteria, and the sources and methods of case ascertainment and control selection. Give the rationale for the choice of cases and controls<br><br><i>Cross-sectional study</i> —Give the eligibility criteria, and the sources and methods of selection of participants | <i>Study population:</i><br><br>Whole female population grouped by 5-year age group, with oldest group consisting of women aged 85 and older, aggregated by country, subcontinent, categories of human development index (HDI) as defined by UN Development Programme and whole world. |
|                      |         | (b) <i>Cohort study</i> —For matched studies, give matching criteria and number of exposed and unexposed                                                                                                                                                                                                                                                                                                                                                                       |                                                                                                                                                                                                                                                                                        |



|                              | <b>Item No</b> | <b>Recommendation</b>                                                                                                                                                                | <b>Implementation of STROBE items</b>                                                                                                                                                                                                                                                                        |
|------------------------------|----------------|--------------------------------------------------------------------------------------------------------------------------------------------------------------------------------------|--------------------------------------------------------------------------------------------------------------------------------------------------------------------------------------------------------------------------------------------------------------------------------------------------------------|
|                              |                | <i>Case-control study</i> —For matched studies, give matching criteria and the number of controls per case                                                                           |                                                                                                                                                                                                                                                                                                              |
| Variables                    | 7              | Clearly define all outcomes, exposures, predictors, potential confounders, and effect modifiers. Give diagnostic criteria, if applicable                                             | Outcomes: number of cases and deaths from cervical cancer, age-standardised incidence and mortality rates, standardised incidence and mortality ratios, cumulative incidence or mortality rates, ranking of cervical cancer incidence and mortality among all cancers, proportional incidence and mortality. |
| Data sources/<br>measurement | 8*             | For each variable of interest, give sources of data and details of methods of assessment (measurement). Describe comparability of assessment methods if there is more than one group | The main sources of data are the most recent available national or regional cancer registries, WHO mortality database and UN population data that were compiled in the GLOBOCAN database.                                                                                                                    |
| Bias                         | 9              | Describe any efforts to address potential sources of bias                                                                                                                            | Indirect and indirect standardisation were used to control for different age compositions of population. Diverse extrapolation methods (explained §2 & 3) were applied to compute incidence and mortality from countries for which data were incomplete or of insufficient quality.                          |
| Study size                   | 10             | Explain how the study size was arrived at                                                                                                                                            | Not of application                                                                                                                                                                                                                                                                                           |
| Quantitative variables       | 11             | Explain how quantitative variables were handled in the analyses. If applicable, describe which groupings were chosen and why                                                         | Groupings by country, subcontinent and whole world, separate grouping for young women aged 15-44 years, grouping by human development index.                                                                                                                                                                 |
| Statistical methods          | 12             | (a) Describe all statistical methods, including those used to control for confounding                                                                                                | Direct and indirect standardisation to control confounding by age. Geographical distribution of the standardised incidence and mortality rates by country is displayed in choropleth world maps and bar charts by continent and country, sorted by decreasing age-standardised mortality.                    |
|                              |                | (b) Describe any methods used to examine subgroups and interactions                                                                                                                  |                                                                                                                                                                                                                                                                                                              |

|                  | <b>Item No</b> | <b>Recommendation</b>                                                                                                                                                                                                                                                                                             | <b>Implementation of STROBE items</b>                                                                                                                                                                                                                                                                                                                                                                                                            |
|------------------|----------------|-------------------------------------------------------------------------------------------------------------------------------------------------------------------------------------------------------------------------------------------------------------------------------------------------------------------|--------------------------------------------------------------------------------------------------------------------------------------------------------------------------------------------------------------------------------------------------------------------------------------------------------------------------------------------------------------------------------------------------------------------------------------------------|
|                  |                | (c) Explain how missing data were addressed                                                                                                                                                                                                                                                                       | A hierarchy of methods was used that were dependent on the availability and quality of the source information from population-based cancer registries; methods ranged from a short-term extrapolation of high quality recorded national incidence rates via short-term prediction models <sup>19</sup> through to the use of observed rates from one or more neighbouring countries in the same region in the complete absence of recorded data. |
|                  |                | (d) <i>Cohort study</i> —If applicable, explain how loss to follow-up was addressed<br><br><i>Case-control study</i> —If applicable, explain how matching of cases and controls was addressed<br><br><i>Cross-sectional study</i> —If applicable, describe analytical methods taking account of sampling strategy | Not of application.                                                                                                                                                                                                                                                                                                                                                                                                                              |
|                  |                | (e) Describe any sensitivity analyses                                                                                                                                                                                                                                                                             | Not of application.                                                                                                                                                                                                                                                                                                                                                                                                                              |
| <b>Results</b>   |                |                                                                                                                                                                                                                                                                                                                   |                                                                                                                                                                                                                                                                                                                                                                                                                                                  |
| Participants     | 13*            | (a) Report numbers of individuals at each stage of study—eg numbers potentially eligible, examined for eligibility, confirmed eligible, included in the study, completing follow-up, and analysed                                                                                                                 | The whole female population of 185 countries was included.                                                                                                                                                                                                                                                                                                                                                                                       |
|                  |                | (b) Give reasons for non-participation at each stage                                                                                                                                                                                                                                                              | Not of application (see 13a). Countries that were not recognised by the United Nations were excluded.                                                                                                                                                                                                                                                                                                                                            |
|                  |                | (c) Consider use of a flow diagram                                                                                                                                                                                                                                                                                | Not of application.                                                                                                                                                                                                                                                                                                                                                                                                                              |
| Descriptive data | 14*            | (a) Give characteristics of study participants (eg demographic, clinical, social) and information on exposures and potential confounders                                                                                                                                                                          | Whole populations were characterised by their age composition and socio-economic development level (HDI). The distribution by HDI is displayed in choropleth map in Suppl Figure 1. The quality of data sources to estimate quality of incidence and mortality by country is described in choropleth maps (Suppl Figures 4 and 5).                                                                                                               |

|                   | Item No | Recommendation                                                                                                                                                                                               | Implementation of STROBE items                                                                                                                                                                                                                                                    |
|-------------------|---------|--------------------------------------------------------------------------------------------------------------------------------------------------------------------------------------------------------------|-----------------------------------------------------------------------------------------------------------------------------------------------------------------------------------------------------------------------------------------------------------------------------------|
|                   |         | (b) Indicate number of participants with missing data for each variable of interest                                                                                                                          | The quality of data sources to estimate quality of incidence and mortality by country is described in choropleth maps (Suppl Figures 4 and 5). These maps identify the countries with missing data for which data had to be estimated from representative neighbouring countries. |
|                   |         | (c) <i>Cohort study</i> —Summarise follow-up time (eg, average and total amount)                                                                                                                             | Not of application.                                                                                                                                                                                                                                                               |
| Outcome data      | 15*     | <i>Cohort study</i> —Report numbers of outcome events or summary measures over time                                                                                                                          | The number of estimated outcome events are included in Table 1 for the whole world, by HDI level and by subcontinent, and in Suppl Table 1 by country.                                                                                                                            |
|                   |         | <i>Case-control study</i> —Report numbers in each exposure category, or summary measures of exposure                                                                                                         |                                                                                                                                                                                                                                                                                   |
|                   |         | <i>Cross-sectional study</i> —Report numbers of outcome events or summary measures                                                                                                                           |                                                                                                                                                                                                                                                                                   |
| Main results      | 16      | (a) Give unadjusted estimates and, if applicable, confounder-adjusted estimates and their precision (eg, 95% confidence interval). Make clear which confounders were adjusted for and why they were included | Diverse incidence and mortality indicators are presented in structured tables, choropleth maps, and sorted bar charts. (Tables 1, Figures 1-3; Suppl Tables 1).                                                                                                                   |
|                   |         | (b) Report category boundaries when continuous variables were categorized                                                                                                                                    | The distribution of age-standardised incidence and mortality by HDI level (very high, high, moderate and low) is shown in the boxplots in Suppl Figure 2.                                                                                                                         |
|                   |         | (c) If relevant, consider translating estimates of relative risk into absolute risk for a meaningful time period                                                                                             | Absolute standardised rates and cumulative risks up to the age of 74 risks as well as standardised relative incidence and mortality ratios are listed in Table 1 and Suppl Table 1.                                                                                               |
| Other analyses    | 17      | Report other analyses done—eg analyses of subgroups and interactions, and sensitivity analyses                                                                                                               | The correlation between age-standardised incidence and the average high-risk HPV prevalence, derived from a recent meta-analysis is shown in an                                                                                                                                   |
| <b>Discussion</b> |         |                                                                                                                                                                                                              |                                                                                                                                                                                                                                                                                   |
| Key results       | 18      | Summarise key results with reference to study objectives                                                                                                                                                     | Key results are summarised in the first § of the Discussion.                                                                                                                                                                                                                      |
| Limitations       | 19      | Discuss limitations of the study, taking into account sources of potential bias or                                                                                                                           | Limitations are discussed in the section “data quality” of the                                                                                                                                                                                                                    |

|                  | <b>Item No</b> | <b>Recommendation</b>                                                                                                                                                      | <b>Implementation of STROBE items</b>                                                                                                                                                                                                                                                                                                                                                                                                                                                                                                                                                                                                                                                                                                                                                                                                                                                      |
|------------------|----------------|----------------------------------------------------------------------------------------------------------------------------------------------------------------------------|--------------------------------------------------------------------------------------------------------------------------------------------------------------------------------------------------------------------------------------------------------------------------------------------------------------------------------------------------------------------------------------------------------------------------------------------------------------------------------------------------------------------------------------------------------------------------------------------------------------------------------------------------------------------------------------------------------------------------------------------------------------------------------------------------------------------------------------------------------------------------------------------|
|                  |                | imprecision. Discuss both direction and magnitude of any potential bias                                                                                                    | <p>Discussion. Only 24% and 44% of countries provided directly usable national incidence and mortality data, respectively. For 32 and 84 countries, no information could be identified for incidence or mortality, respectively, and estimates have been computed either from modelling or from neighbouring countries. The problems related to the death cause coded as uterine cancer not otherwise specified, where it is unclear whether the cancer originates from the cervix uteri or from the corpus uteri is discussed.</p> <p>The successive GLOBOCAN publications present an estimate of the world-wide burden of cancers using the best available data and extrapolation methods for a given year but are not a good base for time trend analyses. To assess impact of interventions, it is recommended to use long-term time series from selected high-quality registries.</p> |
| Interpretation   | 20             | Give a cautious overall interpretation of results considering objectives, limitations, multiplicity of analyses, results from similar studies, and other relevant evidence | <p>The Discussion highlights that the reliability of incidence and mortality estimates is determined by the quality and completeness of registration, and by the appropriateness of external data used to derive unavailable data. The GLOBOCAN 2018 estimates should be compared with future publications of observed cancer incidence &amp; mortality data from national registries for the year 2018.</p>                                                                                                                                                                                                                                                                                                                                                                                                                                                                               |
| Generalisability | 21             | Discuss the generalisability (external validity) of the study results                                                                                                      | <p>In spite of recognised limitations, the presented estimates of the current burden of cervical cancer in the world can be considered as the best possible given present available data.</p>                                                                                                                                                                                                                                                                                                                                                                                                                                                                                                                                                                                                                                                                                              |

|                          | <b>Item No</b> | <b>Recommendation</b>                                                                                                                                         | <b>Implementation of STROBE items</b>                                                                                                                                                                                                      |
|--------------------------|----------------|---------------------------------------------------------------------------------------------------------------------------------------------------------------|--------------------------------------------------------------------------------------------------------------------------------------------------------------------------------------------------------------------------------------------|
|                          |                |                                                                                                                                                               | This 2018 burden paper may serve as a baseline for the targets of the global strategy.                                                                                                                                                     |
| <b>Other information</b> |                |                                                                                                                                                               |                                                                                                                                                                                                                                            |
| Funding                  | 22             | Give the source of funding and the role of the funders for the present study and, if applicable, for the original study on which the present article is based | Sources of funding are mentioned in the acknowledgements section at the end of the manuscript.<br><br>No funding bodies had any role in study design, data collection and analysis, decision to publish, or preparation of the manuscript. |
